# Supplementary material
Source: HighWire-hosted journal article supplement (https://adc.bmj.com/content/108/10/799)
Supplement: inline-supplementary-material-1 [file inline-supplementary-material-1.pdf]

## Supplementary Files / Appendix

Table A. Overview of total and cases of new onset diabetes mellitus in DIMPLES cohort.

|           | YEAR 1 |       |     |      |      |        |           |         |          |          |         |          | YEAR 2 |       |     |      |      |        |           |         |          |          |         |          |
|-----------|--------|-------|-----|------|------|--------|-----------|---------|----------|----------|---------|----------|--------|-------|-----|------|------|--------|-----------|---------|----------|----------|---------|----------|
|           | 1      | 2     | 3   | 4    | 5    | 6      | 7         | 8       | 9        | 10       | 11      | 12       | 1      | 2     | 3   | 4    | 5    | 6      | 7         | 8       | 9        | 10       | 11      | 12       |
| Month     | March  | April | May | June | July | August | September | October | November | December | January | February | March  | April | May | June | July | August | September | October | November | December | January | February |
| All cases | 98     | 102   | 102 | 93   | 87   | 78     | 98        | 99      | 125      | 146      | 122     | 109      | 89     | 84    | 92  | 119  | 124  | 98     | 143       | 121     | 130      | 120      | 109     | 130      |
| New onset | 79     | 83    | 81  | 77   | 68   | 60     | 82        | 81      | 101      | 112      | 97      | 94       | 69     | 72    | 82  | 110  | 112  | 85     | 129       | 99      | 110      | 103      | 93      | 119      |

**Table B. Total cases per site in DIMPLES cohort**

|                                                              | NET change, all | Net change, severe DKA | Net change, NEW | All cases        |                  | Severe DKA       |                  | new onset (any severity) |                  |
|--------------------------------------------------------------|-----------------|------------------------|-----------------|------------------|------------------|------------------|------------------|--------------------------|------------------|
|                                                              |                 |                        |                 | Year 1 (2019-20) | Year 2 (2020-21) | Year 1 (2019-20) | Year 2 (2020-21) | Year 1 (2019-20)         | Year 2 (2020-21) |
| Addenbrooke's Hospital                                       | 5               | -1                     | 13              | 24               | 29               | 6                | 5                | 16                       | 29               |
| Alder Hey Children's Hospital NHS Foundation Trust           | -12             | -3                     | -6              | 33               | 21               | 4                | 1                | 24                       | 18               |
| Barking, Havering & Redbridge University Hospitals NHS Trust | 18              | 5                      | 14              | 37               | 55               | 4                | 9                | 33                       | 47               |
| Birmingham Children's Hospital                               | 21              | 9                      | 22              | 34               | 55               | 4                | 13               | 29                       | 51               |
| Bolton NHS Foundation Trust                                  | 14              | 7                      | 14              | 0                | 14               | 0                | 7                | 0                        | 14               |
| Bristol Royal Hospital for Children                          | -5              | -4                     | 1               | 60               | 55               | 13               | 9                | 51                       | 52               |
| Chelsea and Westminster NHS Foundation Trust                 | 12              | -1                     | 10              | 13               | 25               | 3                | 2                | 13                       | 23               |
| Children's Health Ireland at Crumlin                         | 1               | 7                      | 3               | 46               | 47               | 4                | 11               | 35                       | 38               |
| Children's Health Ireland at Tallaght                        | -26             | -6                     | -25             | 40               | 14               | 8                | 2                | 37                       | 12               |
| Children's Health Ireland at Temple Street                   | 18              | 8                      | 13              | 46               | 64               | 4                | 12               | 39                       | 52               |
| Croydon University Hospital                                  | 1               | 3                      | 1               | 21               | 22               | 3                | 6                | 15                       | 16               |
| Derriford Hospital                                           | 4               | 2                      | 3               | 28               | 32               | 5                | 7                | 22                       | 25               |
| Evelina London Children's Hospital                           | -15             | 2                      | -13             | 26               | 11               | 0                | 2                | 22                       | 9                |
| Frimley Park Hospital                                        | 2               | 1                      | -2              | 33               | 35               | 9                | 10               | 29                       | 27               |
| Ipswich Hospital                                             | 8               | 4                      | 6               | 27               | 35               | 1                | 5                | 24                       | 30               |
| Hull Royal Infirmary                                         | -3              | 1                      | 0               | 16               | 13               | 5                | 6                | 10                       | 10               |
| John Radcliffe Hospital, Oxford                              | 18              | 1                      | 16              | 31               | 49               | 5                | 6                | 31                       | 47               |
| King's College Hospital London                               | -10             | -1                     | -7              | 26               | 16               | 5                | 4                | 21                       | 14               |
| Kingston Hospital NHS Foundation Trust                       | -6              | -3                     | -3              | 10               | 4                | 3                | 0                | 7                        | 4                |
| Leeds General Infirmary                                      | 14              | 8                      | 8               | 23               | 37               | 9                | 17               | 12                       | 20               |
| Leicester Royal Infirmary                                    | 7               | 13                     | 6               | 56               | 63               | 10               | 23               | 52                       | 58               |
| University Hospital Limerick                                 | 1               | 1                      | 1               | 8                | 9                | 0                | 1                | 8                        | 9                |
| North Middlesex Hospital                                     | 0               | 5                      | -3              | 16               | 16               | 0                | 5                | 10                       | 7                |
| Northumbria Healthcare NHS Foundation Trust                  | 7               | 0                      | 3               | 18               | 25               | 2                | 2                | 18                       | 21               |
| Nottingham University Hospitals NHS Trust                    | -4              | 1                      | 1               | 35               | 31               | 9                | 10               | 29                       | 30               |
| Ormskirk & District General Hospital                         | 10              | 2                      | 13              | 15               | 25               | 1                | 3                | 12                       | 25               |
| Royal Alexandra Children's Hospital                          | -6              | -1                     | -5              | 33               | 27               | 5                | 4                | 28                       | 23               |

|                                                           |     |    |     |    |     |    |    |    |     |
|-----------------------------------------------------------|-----|----|-----|----|-----|----|----|----|-----|
| Royal Belfast Hospital for Sick Children                  | 8   | 7  | 8   | 32 | 40  | 6  | 13 | 26 | 34  |
| Royal Berkshire NHS Foundation Trust                      | -1  | 2  | 3   | 28 | 27  | 2  | 4  | 23 | 26  |
| Royal Derby Hospital                                      | -3  | -1 | 5   | 36 | 33  | 7  | 6  | 25 | 30  |
| Royal Hospital for Children, Glasgow                      | 28  | 5  | 35  | 86 | 114 | 16 | 21 | 71 | 106 |
| Royal Preston Hospital                                    | -2  | 2  | 7   | 22 | 20  | 5  | 7  | 9  | 16  |
| Royal Wolverhampton NHS Trust                             | -7  | 1  | -6  | 22 | 15  | 4  | 5  | 17 | 11  |
| Sheffield Children's NHS Foundation Trust                 | 4   | 8  | 5   | 11 | 15  | 3  | 11 | 8  | 13  |
| Shrewsbury & Telford NHS Trust                            | -1  | -1 | 0   | 20 | 19  | 4  | 3  | 17 | 17  |
| South Tyneside & Sunderland NHS Foundation Trust          | 7   | 2  | 10  | 20 | 27  | 3  | 5  | 15 | 25  |
| Southampton Children's Hospital                           | 13  | 6  | 12  | 17 | 30  | 2  | 8  | 17 | 29  |
| St George's University Hospitals NHS Foundation Trust     | 4   | 1  | 3   | 17 | 21  | 2  | 3  | 15 | 18  |
| St Mary's Hospital, Imperial College Healthcare NHS Trust | 1   | 3  | 4   | 21 | 22  | 3  | 6  | 13 | 17  |
| University Hospital Lewisham                              | -2  | 1  | -1  | 17 | 15  | 1  | 2  | 13 | 12  |
| University Hospital of Wales, Cardiff                     | -1  | 1  | 0   | 17 | 16  | 1  | 2  | 14 | 14  |
| Watford General Hospital                                  | 9   | 5  | 9   | 22 | 31  | 0  | 5  | 22 | 31  |
| Whittington Health NHS Trust                              | -15 | -5 | -5  | 15 | 0   | 5  | 0  | 5  | 0   |
| Ulster Hospital                                           | 1   | 2  | 3   | 20 | 21  | 2  | 4  | 16 | 19  |
| University College Hospitals London                       | -13 | -1 | -5  | 13 | 0   | 1  | 0  | 5  | 0   |
| St Richard's Hospital                                     | -5  | -1 | -3  | 22 | 17  | 3  | 2  | 17 | 14  |
| Worthing Hospital                                         | -9  | 1  | -10 | 23 | 14  | 4  | 5  | 17 | 7   |
| The Royal London                                          | 10  | 1  | 10  | 23 | 33  | 4  | 5  | 23 | 33  |

**Table C. Characteristics of patients with decompensation of pre-existing diabetes in the DIMPLES cohort**

| Characteristic     | Overall, N = 311 <sup>1</sup> | Year 1 (2019-20), N = 196 <sup>1</sup> | Year 2 (2020-21), N = 115 <sup>1</sup> | p-value <sup>2</sup> |
|--------------------|-------------------------------|----------------------------------------|----------------------------------------|----------------------|
| Age (years)        | 13 (11,14)                    | 13 (11,14)                             | 13 (11,14)                             | 0.6                  |
| Sex (female)       | 135 (43%)                     | 85 (43%)                               | 50 (43%)                               | >0.9                 |
| Ethnicity          |                               |                                        |                                        | 0.8                  |
| Asian other        | 4 (1.8%)                      | 3 (2.2%)                               | 1 (1.2%)                               |                      |
| South Asian        | 7 (3.2%)                      | 5 (3.6%)                               | 2 (2.4%)                               |                      |
| Black              | 36 (16%)                      | 23 (17%)                               | 13 (16%)                               |                      |
| Mixed              | 12 (5.5%)                     | 7 (5.1%)                               | 5 (6.1%)                               |                      |
| White              | 153 (70%)                     | 97 (70%)                               | 56 (68%)                               |                      |
| Other              | 8 (3.6%)                      | 3 (2.2%)                               | 5 (6.1%)                               |                      |
| missing            | 91                            | 58                                     | 33                                     |                      |
| Deprivation decile |                               |                                        |                                        |                      |
| 1                  | 48 (19%)                      | 28 (17%)                               | 20 (22%)                               |                      |
| 2                  | 62 (24%)                      | 40 (24%)                               | 22 (24%)                               |                      |
| 3                  | 30 (12%)                      | 22 (13%)                               | 8 (8.8%)                               |                      |
| 4                  | 24 (9.3%)                     | 13 (7.8%)                              | 11 (12%)                               |                      |
| 5                  | 25 (9.7%)                     | 16 (9.6%)                              | 9 (9.9%)                               |                      |
| 6                  | 12 (4.7%)                     | 10 (6.0%)                              | 2 (2.2%)                               |                      |

| Characteristic                           | Overall, N = 311 <sup>1</sup> | Year 1 (2019-20), N = 196 <sup>1</sup> | Year 2 (2020-21), N = 115 <sup>1</sup> | p-value <sup>2</sup> |
|------------------------------------------|-------------------------------|----------------------------------------|----------------------------------------|----------------------|
| 7                                        | 15 (5.8%)                     | 9 (5.4%)                               | 6 (6.6%)                               |                      |
| 8                                        | 12 (4.7%)                     | 8 (4.8%)                               | 4 (4.4%)                               |                      |
| 9                                        | 13 (5.0%)                     | 10 (6.0%)                              | 3 (3.3%)                               |                      |
| 10                                       | 17 (6.6%)                     | 11 (6.6%)                              | 6 (6.6%)                               |                      |
| missing                                  | 53                            | 29                                     | 24                                     |                      |
| Comorbidities <sup>3</sup>               |                               |                                        |                                        |                      |
| No comorbidity                           | 247 (79%)                     | 153 (78%)                              | 94 (82%)                               | 0.4                  |
| Coeliac disease                          | 14 (4.5%)                     | 8 (4.1%)                               | 6 (5.2%)                               | 0.6                  |
| Thyroid disease                          | 16 (5.1%)                     | 14 (7.1%)                              | 2 (1.7%)                               | 0.037                |
| Other endocrine                          | 7 (2.3%)                      | 2 (1.0%)                               | 5 (4.3%)                               | 0.11                 |
| Other autoimmune                         | 1 (0.3%)                      | 1 (0.5%)                               | 0 (0%)                                 | >0.9                 |
| Other                                    | 14 (4.5%)                     | 10 (5.1%)                              | 4 (3.5%)                               | 0.5                  |
| Family history <sup>3</sup>              |                               |                                        |                                        |                      |
| Type 1 diabetes                          | 29 (9.3%)                     | 16 (8.2%)                              | 13 (11%)                               | 0.4                  |
| Type 2 diabetes                          | 3 (1.0%)                      | 2 (1.0%)                               | 1 (0.9%)                               | >0.9                 |
| Coeliac disease                          | 1 (0.3%)                      | 1 (0.5%)                               | 0 (0%)                                 | >0.9                 |
| Thyroid disease                          | 3 (1.0%)                      | 2 (1.0%)                               | 1 (0.9%)                               | >0.9                 |
| Other autoimmune or inflammatory disease | 1 (0.3%)                      | 0 (0%)                                 | 1 (0.9%)                               | 0.4                  |

| Characteristic | Overall, N = 311 <sup>1</sup> | Year 1 (2019-20), N = 196 <sup>1</sup> | Year 2 (2020-21), N = 115 <sup>1</sup> | p-value <sup>2</sup> |
|----------------|-------------------------------|----------------------------------------|----------------------------------------|----------------------|
| None           | 276 (89%)                     | 177 (90%)                              | 99 (86%)                               | 0.3                  |
| Type           |                               |                                        |                                        | 0.4                  |
| Type 1         | 306 (98%)                     | 194 (99%)                              | 112 (97%)                              |                      |
| Type 2         | 0 (0%)                        | 0 (0%)                                 | 0 (0%)                                 |                      |
| Other          | 5 (1.6%)                      | 2 (1.0%)                               | 3 (2.6%)                               |                      |

<sup>1</sup>Median (25%,75%); n (%)

<sup>2</sup>Wilcoxon rank sum test; Pearson's Chi-squared test; Fisher's exact test

<sup>3</sup>Tick all that apply

**Table D. Presenting symptoms, severity, treatment and outcomes of patients with decompensation of pe-existing diabetes in the DIMPLES cohort**

| Characteristic             | Overall, N = 420 <sup>1</sup> | Year 1 (2019-20), N = 244 <sup>1</sup> | Year 2 (2020-21), N = 176 <sup>1</sup> | p-value <sup>2</sup> |
|----------------------------|-------------------------------|----------------------------------------|----------------------------------------|----------------------|
| <i>Presenting symptoms</i> |                               |                                        |                                        |                      |
| Polyuria                   |                               |                                        |                                        | 0.2                  |
| Yes                        | 54 (13%)                      | 31 (13%)                               | 23 (13%)                               |                      |
| No                         | 201 (48%)                     | 125 (51%)                              | 76 (43%)                               |                      |
| Unknown                    | 165 (39%)                     | 88 (36%)                               | 77 (44%)                               |                      |
| Polydipsia                 |                               |                                        |                                        | 0.079                |
| Yes                        | 58 (14%)                      | 33 (14%)                               | 25 (14%)                               |                      |
| No                         | 193 (46%)                     | 123 (50%)                              | 70 (40%)                               |                      |
| Unknown                    | 169 (40%)                     | 88 (36%)                               | 81 (46%)                               |                      |
| Weight loss                |                               |                                        |                                        | 0.009                |
| Yes                        | 20 (4.8%)                     | 8 (3.3%)                               | 12 (6.8%)                              |                      |
| No                         | 199 (47%)                     | 130 (53%)                              | 69 (39%)                               |                      |
| Unknown                    | 201 (48%)                     | 106 (43%)                              | 95 (54%)                               |                      |
| Lethargy                   |                               |                                        |                                        | 0.050                |
| Yes                        | 154 (37%)                     | 85 (35%)                               | 69 (39%)                               |                      |
| No                         | 117 (28%)                     | 79 (32%)                               | 38 (22%)                               |                      |
| Unknown                    | 149 (35%)                     | 80 (33%)                               | 69 (39%)                               |                      |

| Characteristic         | Overall, N = 420 <sup>1</sup> | Year 1 (2019-20), N = 244 <sup>1</sup> | Year 2 (2020-21), N = 176 <sup>1</sup> | p-value <sup>2</sup> |
|------------------------|-------------------------------|----------------------------------------|----------------------------------------|----------------------|
| Confusion              |                               |                                        |                                        | 0.072                |
| Yes                    | 39 (9.3%)                     | 20 (8.2%)                              | 19 (11%)                               |                      |
| No                     | 228 (54%)                     | 144 (59%)                              | 84 (48%)                               |                      |
| Unknown                | 153 (36%)                     | 80 (33%)                               | 73 (41%)                               |                      |
| Vomiting               |                               |                                        |                                        | >0.9                 |
| Yes                    | 339 (81%)                     | 198 (81%)                              | 141 (80%)                              |                      |
| No                     | 62 (15%)                      | 35 (14%)                               | 27 (15%)                               |                      |
| Unknown                | 19 (4.5%)                     | 11 (4.5%)                              | 8 (4.5%)                               |                      |
| Fever                  |                               |                                        |                                        | 0.4                  |
| Yes                    | 30 (7.1%)                     | 21 (8.6%)                              | 9 (5.1%)                               |                      |
| No                     | 317 (75%)                     | 181 (74%)                              | 136 (77%)                              |                      |
| Unknown                | 73 (17%)                      | 42 (17%)                               | 31 (18%)                               |                      |
| Tachycardia            | 291 (71%)                     | 162 (68%)                              | 129 (75%)                              | 0.14                 |
| missing                | 11                            | 7                                      | 4                                      |                      |
| Tachypnea              | 217 (54%)                     | 118 (51%)                              | 99 (58%)                               | 0.14                 |
| missing                | 18                            | 12                                     | 6                                      |                      |
| Level of consciousness |                               |                                        |                                        | 0.2                  |
| Alert                  | 386 (92%)                     | 224 (92%)                              | 162 (92%)                              |                      |



| Characteristic                | Overall, N = 420 <sup>1</sup> | Year 1 (2019-20), N = 244 <sup>1</sup> | Year 2 (2020-21), N = 176 <sup>1</sup> | p-value <sup>2</sup> |
|-------------------------------|-------------------------------|----------------------------------------|----------------------------------------|----------------------|
| Verbal                        | 17 (4.0%)                     | 7 (2.9%)                               | 10 (5.7%)                              |                      |
| Pain                          | 2 (0.5%)                      | 2 (0.8%)                               | 0 (0%)                                 |                      |
| Unresponsive                  | 2 (0.5%)                      | 1 (0.4%)                               | 1 (0.6%)                               |                      |
| Not documented                | 13 (3.1%)                     | 10 (4.1%)                              | 3 (1.7%)                               |                      |
| Oxygen saturations            |                               |                                        |                                        | >0.9                 |
| Normal %O2 saturations        | 416 (99%)                     | 242 (99%)                              | 174 (99%)                              |                      |
| %O2 saturations <94%          | 4 (1.0%)                      | 2 (0.8%)                               | 2 (1.1%)                               |                      |
| Duration of symptoms (days)   | 1 (1,2)                       | 1 (1,2)                                | 1 (1,2)                                | 0.9                  |
| missing                       | 3                             | 2                                      | 1                                      |                      |
| <i>Laboratory values</i>      |                               |                                        |                                        |                      |
| HbA1c                         | 86 (70,110)                   | 86 (72,110)                            | 86 (70,111)                            | 0.9                  |
| missing                       | 267                           | 162                                    | 105                                    |                      |
| HbA1c percentage              | 10 (9,13)                     | 10 (9,12)                              | 10 (9,13)                              | 0.8                  |
| missing                       | 346                           | 204                                    | 142                                    |                      |
| <i>Measures of severity</i>   |                               |                                        |                                        |                      |
| Triage urgency classification |                               |                                        |                                        | 0.4                  |
| Immediate                     | 48 (11%)                      | 26 (11%)                               | 22 (12%)                               |                      |
| Very urgent                   | 244 (58%)                     | 142 (58%)                              | 102 (58%)                              |                      |

| Characteristic                          | Overall, N = 420 <sup>1</sup> | Year 1 (2019-20), N = 244 <sup>1</sup> | Year 2 (2020-21), N = 176 <sup>1</sup> | p-value <sup>2</sup> |
|-----------------------------------------|-------------------------------|----------------------------------------|----------------------------------------|----------------------|
| Urgent                                  | 67 (16%)                      | 42 (17%)                               | 25 (14%)                               |                      |
| Non-urgent                              | 7 (1.7%)                      | 5 (2.0%)                               | 2 (1.1%)                               |                      |
| Standard                                | 0 (0%)                        | 0 (0%)                                 | 0 (0%)                                 |                      |
| Not documented                          | 51 (12%)                      | 29 (12%)                               | 22 (12%)                               |                      |
| Unknown                                 | 3 (0.7%)                      | 0 (0%)                                 | 3 (1.7%)                               |                      |
| pH                                      | 7.20 (7.09,7.27)              | 7.21 (7.10,7.27)                       | 7.20 (7.07,7.26)                       | 0.2                  |
| missing                                 | 3                             | 1                                      | 2                                      |                      |
| Fluid bolus >=20 mls/kg                 | 55 (13%)                      | 24 (9.8%)                              | 31 (18%)                               | 0.020                |
| Inotropes / vasopressors                | 0 (0%)                        | 0 (0%)                                 | 0 (0%)                                 |                      |
| Mechanical ventilation                  | 2 (0.5%)                      | 1 (0.4%)                               | 1 (0.6%)                               | >0.9                 |
| Route of initial insulin administration |                               |                                        |                                        | 0.2                  |
| Subcutaneous                            | 71 (17%)                      | 46 (19%)                               | 25 (14%)                               |                      |
| Intravenous                             | 349 (83%)                     | 198 (81%)                              | 151 (86%)                              |                      |
| Diabetic keto-acidosis                  |                               |                                        |                                        | 0.8                  |
| Not in DKA                              | 0 (0%)                        | 0 (0%)                                 | 0 (0%)                                 |                      |
| Mild                                    | 218 (52%)                     | 130 (53%)                              | 88 (50%)                               |                      |
| Moderate                                | 97 (23%)                      | 55 (23%)                               | 42 (24%)                               |                      |
| Severe                                  | 105 (25%)                     | 59 (24%)                               | 46 (26%)                               |                      |

| Characteristic                     | Overall, N = 420 <sup>1</sup> | Year 1 (2019-20), N = 244 <sup>1</sup> | Year 2 (2020-21), N = 176 <sup>1</sup> | p-value <sup>2</sup> |
|------------------------------------|-------------------------------|----------------------------------------|----------------------------------------|----------------------|
| Disposition <sup>3</sup>           |                               |                                        |                                        |                      |
| Admission to inpatient ward        | 313 (75%)                     | 178 (73%)                              | 135 (77%)                              | 0.4                  |
| High dependency unit               | 105 (25%)                     | 60 (25%)                               | 45 (26%)                               | 0.8                  |
| Paediatric intensive care unit     | 19 (4.5%)                     | 12 (4.9%)                              | 7 (4.0%)                               | 0.6                  |
| Critical care retrieval            | 3 (0.7%)                      | 0 (0%)                                 | 3 (1.7%)                               | 0.073                |
| Transfer to other hospital         | 8 (1.9%)                      | 0 (0%)                                 | 8 (4.5%)                               | <0.001               |
| Discharged home from ED            | 4 (1.0%)                      | 4 (1.6%)                               | 0 (0%)                                 | 0.14                 |
| Admitted to short stay unit        | 8 (1.9%)                      | 7 (2.9%)                               | 1 (0.6%)                               | 0.15                 |
| Patient died                       | 0 (0%)                        | 0 (0%)                                 | 0 (0%)                                 |                      |
| Length of stay in hospital (days)  | 2 (1,4)                       | 2 (1,3)                                | 2 (2,4)                                | 0.049                |
| Length of stay in hospital >72 hrs | 181 (43%)                     | 98 (40%)                               | 83 (47%)                               | 0.2                  |

<sup>1</sup>n (%); Median (25%,75%)

<sup>2</sup>Pearson's Chi-squared test; Fisher's exact test; Wilcoxon rank sum test

<sup>3</sup>Tick all that apply

**Table E. Patients (n=16) with positive SARS-CoV-2 PCR on admission.**

| age | ssex   | weight | IMD centile | ethnicity                                       | new vs decompensation; type of Abs     | severity of DKA | delays <sup>^</sup> | duration of symptoms (days)* | pH   | base excess | HCO <sub>3</sub> <sup>-</sup> | disposition      | LOS (days) |
|-----|--------|--------|-------------|-------------------------------------------------|----------------------------------------|-----------------|---------------------|------------------------------|------|-------------|-------------------------------|------------------|------------|
| 9   | female | 31.7   | 8           | Asian - any other Asian background              | New onset;<br>Abs <sup>+</sup> 1,3,4,5 | Moderate        | 4                   | 8                            | 7.17 | -17.6       | 11.6                          | Admitted to ward | 8          |
| 13  | female | 40.0   | 3           | Black - Caribbean or Black British Caribbean    | New onset;<br>Abs 1,3,4,5              | Severe          | 2, 7 <sup>§</sup>   | 7                            | 6.87 | -28.5       | 6.4                           | Admitted to HDU  | 0          |
| 12  | female | 74.7   | 1           | Asian - Pakistani or British Pakistani          | New onset<br>Abs nil                   | not in DKA      |                     | 30                           | 7.36 | -4.3        | 21.2                          | Admitted to ward | 2          |
| 4   | female | 15.7   | 1           | White - any other White background              | New onset;<br>Abs n/a                  | Mild            |                     | 45                           | 7.28 | -15.5       | 8.9                           | Admitted to ward | 10         |
| 15  | female |        | 4           | White - British                                 | Decompensation of known disease        | Mild            |                     | 3                            | 7.28 | -10.2       | 16.6                          | Admitted to ward | 3          |
| 13  | male   | 36.5   | 6           | White - British                                 | New onset;<br>Abs 1,3,5                | Mild            |                     | 14                           | 7.21 | -14.2       | 13.7                          | Admitted to ward | 3          |
| 9   | male   | 40.3   | 2           | Mixed - any other Mixed background <sup>1</sup> | New onset;<br>Abs 1                    | Moderate        |                     | 7                            | 7.11 | n/a         | 10.3                          | Admitted to ward | 5          |
| 10  | female | 38.5   | 9           | White - British                                 | New onset;<br>Abs 3,5                  | not in DKA      |                     | 90                           | 7.33 | -10.5       | 16.7                          | Admitted to ward | 1          |

|    |        |      |     |                                              |                                                                                 |          |  |    |      |       |      |                  |    |
|----|--------|------|-----|----------------------------------------------|---------------------------------------------------------------------------------|----------|--|----|------|-------|------|------------------|----|
| 11 | male   | 35.0 | n/a | White - British                              | New onset<br>Abs 1                                                              | Severe   |  | 5  | 6.95 | -23.0 | 8.0  | Admitted to HDU  | 4  |
| 12 | male   | 32.0 | 1   | Not collected                                | New onset;<br>Abs n/a                                                           | Severe   |  | 60 | 7.09 | -21.4 | 6.8  | Admitted to HDU  | 2  |
| 15 | male   | 43.0 | 2   | Not stated                                   | New onset;<br>Abs 1                                                             | Moderate |  | 30 | 7.27 | -10.0 | 17.0 | Admitted to ward | 3  |
| 15 | female | 55.0 | 2   | Black - Caribbean or Black British Caribbean | Decompensation of known disease                                                 | Severe   |  | 2  | 6.78 | -31.0 | 4.7  | Admitted to HDU  | 15 |
| 2  | male   | 11.9 | 2   | White - any other White background           | New onset;<br>Abs 1,3                                                           | Severe   |  | 3  | 7.02 | -25.5 | 3.7  | Admitted to HDU  | 7  |
| 12 | female | 63.8 | 3   | Black - any other Black background           | Decompensation of known disease                                                 | Moderate |  | 2  | 7.12 | -18.0 | 12.1 | Admitted to ward | 5  |
| 13 | female | 67.5 | 4   | White - British                              | Decompensation of known disease [attributing factor: compliance with treatment] | Severe   |  | 1  | 6.90 | -26.2 | 7.2  | Admitted to ward | 2  |
| 10 | male   | 31.7 | 8   | Black - African or British African           | New onset;<br>Abs 1,3                                                           | Mild     |  | 30 | 7.22 | n/a   | 14.1 | Admitted to ward | 10 |

Abs antibodies; DKA diabetic keto-acidosis; IMD index of multiple deprivation; LOS length of stay;

All type 1 DM

@ Arrival month: 1—12 Year 1 starting March 2019, 13—24 Year 2 ("COVID-19 period") starting March 2020.

^Delays:

- 1 Delay in getting GP appointment
  - 2 Delay in GP referral to hospital
  - 3 General COVID-related advice to "stay at home" - NO consultation with primary care (GP, 111, or equivalent)
  - 4 Advised to stay at home as outcome of primary care consultation (GP, 111, or equivalent) - either COVID or non-COVID-related
  - 5 Parent/child concerns over visiting hospital - non-COVID related
  - 6 Parent/child concerns over visiting hospital - related to COVID exposure
  - 7 Other
  - 8 No delay documented
- § reason, Other: "Telephone consult with paediatric consultant one week earlier for nocturnal enuresis, also had 5kg weight loss. Diagnosis not considered"

+Type of antibodies (for new onset disease):

- 1 GAD abs
- 2 Insulin auto-abs
- 3 Islet cell abs
- 4 Insulin PTP2a
- 5 ZNT8

**Table F. Patients (n=8) with positive SARS-CoV-2 serology on admission.**

| age | sex    | weight | IMD centile | ethnicity                                  | new vs decompensation                              | comorbidities | severity of DKA | delays ^ | duration of Symptoms (days) | co-existing diagnoses | pH   | base excess | HCO <sub>3</sub> <sup>-</sup> | disposition      | LOS days |
|-----|--------|--------|-------------|--------------------------------------------|----------------------------------------------------|---------------|-----------------|----------|-----------------------------|-----------------------|------|-------------|-------------------------------|------------------|----------|
| 12  | female | 73.0   | 2           | Asian - Pakistani or British Pakistani     | New onset IgM+/IgG-;<br>Abs nil                    | Acne          | not in DKA      | 8        | 49                          | Asthma                | 7.41 | -1.7        | 23.3                          | Admitted to ward | 4        |
| 15  | male   | 48.3   | 2           | Asian - Bangladeshi or British Bangladeshi | New onset IgG+/IgM-;<br>Abs <sup>+</sup> 1,2,3,4,5 | none          | not in DKA      | 8        | N/A                         | N/A                   | 7.36 | 3.1         | 21.8                          | Admitted to ward | 5        |
| 9   | female | 35.6   | 2           | Black - any other Black background         | New onset IgG+/IgM<br>Abs nil                      | Respiratory   | not in DKA      | 1        | 30                          | N/A                   | 7.38 | -5.5        | 26.2                          | Admitted to ward | 6        |
| 7   | male   | 27.0   | 6           | White - British                            | New onset IgG+/IgM-;<br>Abs 1,3,4,5                | none          | not in DKA      | 8        | 7                           | N/A                   | 7.36 | -1.7        | 23.7                          | Admitted to ward | 3        |
| 13  | male   | 39.0   | 4           | Asian - Bangladeshi or British Bangladesh  | New onset IgG+/IgM-<br>Abs nil                     | Respiratory   | not in DKA      | 8        | 90                          | N/A                   | 7.34 | .2          | 23.5                          | Admitted to ward | 4        |
| 15  | female | 46.3   | 2           | Black - African or British African         | New onset IgG+/IgM-;<br>Abs 1                      | none          | Moderate        | 8        | 14                          | N/A                   | 7.17 | -24.1       | 4.4                           | Admitted to ward | 2        |
| 5   | male   | 18.6   | 3           | Asian - any other Asian background         | New onset IgG+/IgM-;<br>Abs 1                      | none          | not in DKA      | 8        | 3                           | N/A                   | 7.33 | -3.2        | 22.7                          | Admitted to ward | 5        |

|    |      |      |   |                                    |                                 |      |          |   |   |     |      |       |     |                 |   |
|----|------|------|---|------------------------------------|---------------------------------|------|----------|---|---|-----|------|-------|-----|-----------------|---|
| 13 | male | 55.4 | 3 | Asian - any other Asian background | New onset IgG+/IgM-;<br>Abs 1,3 | none | Moderate | 8 | 4 | N/A | 7.16 | -20.5 | 8.2 | Admitted to HDU | 0 |
|----|------|------|---|------------------------------------|---------------------------------|------|----------|---|---|-----|------|-------|-----|-----------------|---|

Abs antibodies; DKA diabetic keto-acidosis; IMD index of multiple deprivation; LOS length of stay;

All type 1 DM

@ Arrival month: 1-12 Year 1, 13—24 Year 2 ("COVID-19 period") starting March 2020.

^

1 Delay in getting GP appointment

2 Delay in GP referral to hospital

3 General COVID-related advice to "stay at home" - NO consultation with primary care (GP, 111, or equivalent)

4 Advised to stay at home as outcome of primary care consultation (GP, 111, or equivalent) - either COVID or non-COVID-related

5 Parent/child concerns over visiting hospital - non-COVID related

6 Parent/child concerns over visiting hospital - related to COVID exposure

7 Other

8 No delay documented

\*Type of antibodies (for new onset disease):

1 GAD abs

2 Insulin auto-abs

3 Islet cell abs

4 Insulin PTP2a

5 ZNT8
